# Supplementary material
Source: publisher figshare collection journal article supplement (https://aacr.figshare.com/articles/dataset/_/22433399)

# Supplementary Figure 1

## A

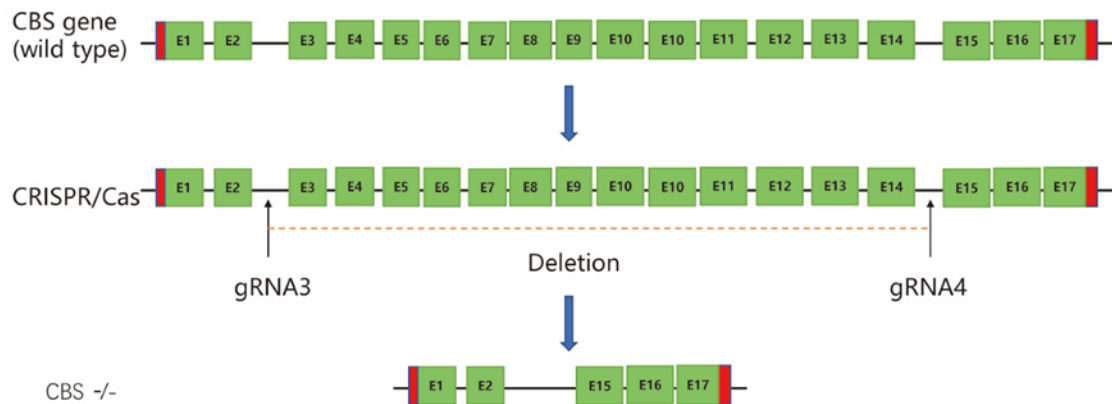

## B

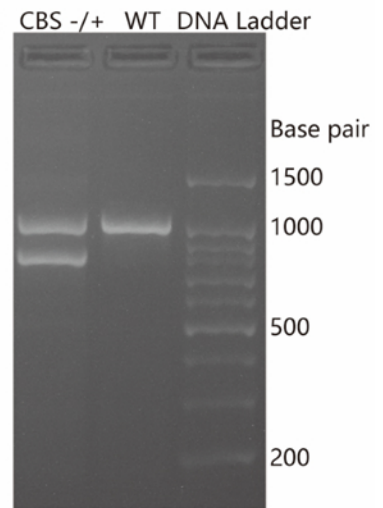

## C

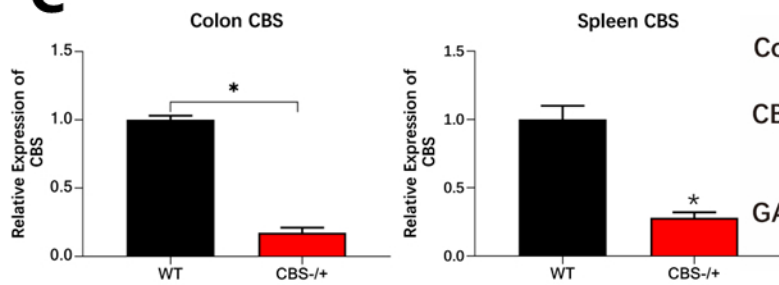

## D

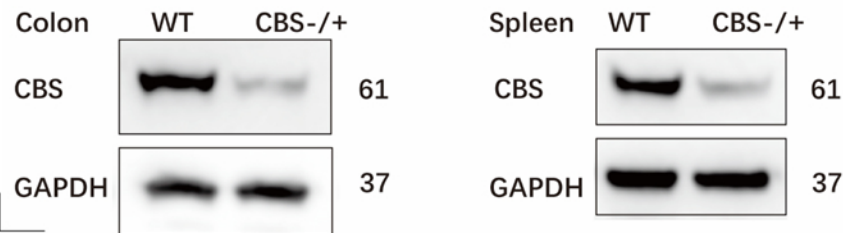

## E

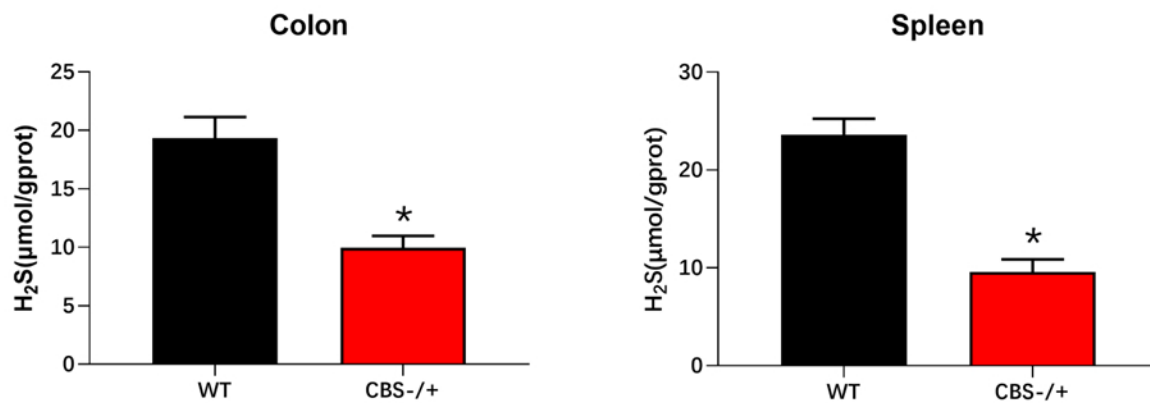

## F

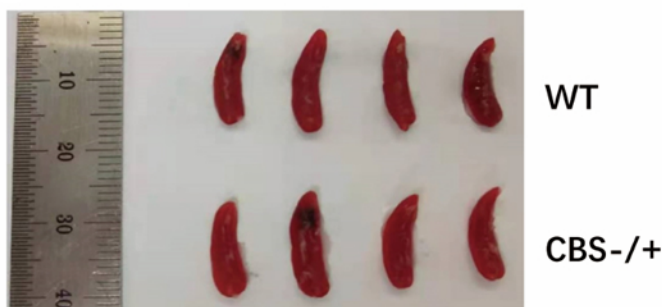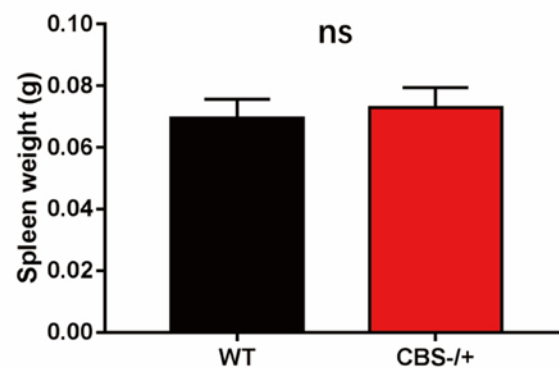

Supplement: Supplementary file 1 [file 39879839]
